# Supplementary material for: Derivation of aerosol profiles for MC3E convection studies and use in simulations of the 20 May squall line case
Source: Copernicus journal article supplement (doi:10.5194/acp-17-5947-2017), 2017-05-15
Supplement: Supplementary file 1 [file acp-17-5947-2017-supplement.zip]

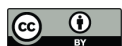

## *Supplement of*

# **Derivation of aerosol profiles for MC3E convection studies and use in simulations of the 20 May squall line case**

**Ann M. Fridlind et al.**

*Correspondence to:* Ann M. Fridlind ([ann.fridlind@nasa.gov](mailto:ann.fridlind@nasa.gov))

- [acp-17-5947-2017-supplement-title-page.pdf](#)
- [supplement\\_1.zip](#)
- [supplement\\_2.zip](#)

The copyright of individual parts of the supplement might differ from the CC-BY 3.0 licence.
